# Supplementary material for: 3D Microstructural Architecture of Muscle Attachments in Extant and Fossil Vertebrates Revealed by Synchrotron Microtomography
Source: PLoS One. 2013 Feb 26;8(2):e56992. doi: 10.1371/journal.pone.0056992 (PMC3582629; doi:10.1371/journal.pone.0056992)
Supplement: Table S3 — Counts of osteocyte lacunae in the four cubes extracted from the humerus of Desmognathus. (XLSX) [file pone.0056992.s007.xlsx]

## Sheet: Sheet1
	Cube 1	Cube 2	Cube 3	Cube 4
Number of osteocyte lacunae	84	34	56	31
