# Supplementary material for: 3D Microstructural Architecture of Muscle Attachments in Extant and Fossil Vertebrates Revealed by Synchrotron Microtomography
Source: PLoS One. 2013 Feb 26;8(2):e56992. doi: 10.1371/journal.pone.0056992 (PMC3582629; doi:10.1371/journal.pone.0056992)
Supplement: Table S4 — Counts of osteocyte lacunae in cubes 3 and 4 from Desmognathus whose maximum length coincides with one referential axis: X, Y or Z. (XLSX) [file pone.0056992.s008.xlsx]

## Sheet: Sheet1
referential axes	cube 3	cube 4
X	27	12
Y	5	0
Z	0	2
