# Supplementary material for: 3D Microstructural Architecture of Muscle Attachments in Extant and Fossil Vertebrates Revealed by Synchrotron Microtomography
Source: PLoS One. 2013 Feb 26;8(2):e56992. doi: 10.1371/journal.pone.0056992 (PMC3582629; doi:10.1371/journal.pone.0056992)
Supplement: Table S6 — Orientation of the maximum length of the bone cell lacunae in the sample cubes of Desmognathus, Eusthenopteron and Compagopiscis. (XLSX) [file pone.0056992.s010.xlsx]

## Sheet: Sheet1
species	referential axes	cube 1	cube 2	cube 3	cube 4
Desmognathus	X	29	9	27	12
	Y	14	1	5	0
	Z	13	11	0	2
Eusthenopteron	X	79	126	130	70
	Y	30	42	34	34
	Z	291	231	293	156
Compagopiscis	X	195	228	153	236
	Y	156	135	196	21
	Z	82	209	176	206
